# Supplementary material for: Epoxidation of Cardanol’s Terminal Double Bond
Source: MDPI journal article supplement (doi:10.3390/polym12092104), 2020-09-16

# Epoxidation of Cardanol's Terminal Double Bond

Emre Kinaci <sup>1</sup>, Erde Can <sup>2</sup>, John J. La Scala <sup>3</sup> and Giuseppe R. Palmese <sup>1,\*</sup>

<sup>1</sup> Department of Chemical and Biological Engineering, Drexel University, Philadelphia, PA 19104, USA; peveenrete@gmail.com

<sup>2</sup> Department of Chemical Engineering, Faculty of Engineering, Yeditepe University, Ataşehir 34755, Istanbul, Turkey; erde.can@yeditepe.edu.tr

<sup>3</sup> Army Research Laboratory, 4600 Deer Creek Loop, Aberdeen Proving Grounds, MD 21005-5096, USA; john.j.lascala.civ@mail.mil

\* Correspondence: grp27@drexel.edu; Tel.: +1-215-895-5814

Received: 29 August 2020; Accepted: 14 September 2020; Published: date

## Supplementary Information

### <sup>1</sup>H-NMR analysis of SCECGE and TE-SCECGE resins.

**Equations S1, S2, S3:** Equations to calculate different monomer functionalities for SCECGE and TE-SCECGE resins.

$$\text{Terminal double bond functionality:} \quad ((I_B + I_D)/I_J) \times (3/3) \quad (\text{S1})$$

$$\text{Secondary epoxy functionality:} \quad (I_C)/I_J \times (3/1) \quad (\text{S2})$$

$$\text{Primary epoxy functionality:} \quad (I_L)/I_J \times (3/1) \quad (\text{S3})$$

**Table S1.** Normalized peak intensity values as obtained via <sup>1</sup>H-NMR traces of the reactant SCECGE.

| Peak Designation | Shift (ppm) | Peak Name                                                            | Normalized Intensity |
|------------------|-------------|----------------------------------------------------------------------|----------------------|
| B–D              | 5.2–5.8     | Terminal double bond (-CH <sub>2</sub> =CH)                          | 0.96 (3H)            |
| C'               | 2.9–3.2     | Secondary epoxy (CH-O-CH)                                            | 1.40 (1H)            |
| L                | 3.4         | Primary epoxy & terminal epoxy CH <sub>2</sub> -CH-O-CH <sub>2</sub> | 1.05 (1H)            |
| J                | 0.88        | Terminal methyl (-CH <sub>3</sub> )                                  | 3 (3H)               |

**Table S2.** Normalized peak intensity values as obtained via <sup>1</sup>H-NMR traces of the product TE-SCECGE.

| Peak Designation | Shift (ppm) | Peak Name                                                            | Normalized Intensity |
|------------------|-------------|----------------------------------------------------------------------|----------------------|
| B–D              | 5.2–5.8     | Terminal double bond (-CH <sub>2</sub> =CH)                          | 0.30 (3H)            |
| C'               | 2.9–3.2     | Secondary epoxy (CH-O-CH)                                            | 1.40 (1H)            |
| L                | 3.4         | Primary epoxy & terminal epoxy CH <sub>2</sub> -CH-O-CH <sub>2</sub> | 1.25 (1H)            |
| J                | 0.88        | Terminal methyl (-CH <sub>3</sub> )                                  | 3 (3H)               |

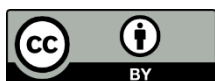

Supplement: s1 [file s1]
